## $Ca^{2+}$ Uptake and $Ca^{2+}$ Release by Skeletal Muscle Sarcoplasmic Reticulum:

*Differing Sensitivity to Inhalational Anesthetics*

Thomas E. Nelson, Ph.D.,\* T. Sweo, B.A.†

The effects of halothane, enflurane, and isoflurane were measured on two different mechanisms of  $Ca^{2+}$  regulation by isolated skeletal muscle sarcoplasmic reticulum (SR) membranes. A 100,000-dalton  $Ca^{2+}$ -ATPase protein transports  $Ca^{2+}$  from outside to inside the SR membrane. At concentration ranges representing anesthetic levels of 0.06 to 2.3 times MAC, halothane, enflurane, and isoflurane each increased rate of  $Ca^{2+}$  uptake by SR. Each concentration of isoflurane produced a greater rate of  $Ca^{2+}$  uptake, whereas halothane and enflurane produced maximum stimulation of  $Ca^{2+}$  uptake at 1 and 1.6 times MAC, respectively. The second  $Ca^{2+}$  regulation mechanism studied was a  $Ca^{2+}$  release channel in the SR membrane. The release of  $Ca^{2+}$  via this mechanism requires a critical threshold  $Ca^{2+}$  load (nmol  $Ca^{2+}$ /mg SR protein) for  $Ca^{2+}$ -induced  $Ca^{2+}$  release to occur. Each anesthetic tested effectively lowered the critical  $Ca^{2+}$  load threshold for  $Ca^{2+}$  release, i.e., the  $Ca^{2+}$  channel was more readily induced to an open state in the presence of anesthetic. The concentrations of anesthetics having this effect on the putative  $Ca^{2+}$  channel were between 0.0026 and 0.078 MAC equivalents for each agent, and these concentrations are much lower than the anesthetic concentrations affecting  $Ca^{2+}$  uptake. These data show that in isolated skeletal muscle SR membranes a  $Ca^{2+}$  channel release function is altered at anesthetic concentrations far below those that change  $Ca^{2+}$  uptake function by a  $Ca^{2+}$ -ATPase and below concentrations of the volatile agents producing clinical anesthesia. The  $Ca^{2+}$  channel effect may represent protein-anesthetic interaction, whereas the  $Ca^{2+}$ -ATPase effect may occur by a generalized SR membrane perturbation by the anesthetics. (Key words: Anesthetics, volatile: enflurane; halothane; isoflurane. Ions, calcium: channels; regulation; transport. Muscle, skeletal: sarcoplasmic reticulum.)

SKELETAL MUSCLE, unlike cardiac muscle, is not dependent upon extracellular  $Ca^{2+}$  for contractility because of adequate, stable intracellular stores of  $Ca^{2+}$ . These stores of  $Ca^{2+}$  in skeletal muscle sarcoplasmic reticulum (SR) reside primarily within the terminal sacs (cisternae) of the SR, and these structures are electromechanically coupled to the transverse tubule aspect of the sarcolemma (fig. 1). The terminal cisternae contain a  $Ca^{2+}$  binding protein, calsequestrin, and the  $Ca^{2+}$  channels that open to release

$Ca^{2+}$  in response to signals coupled by the feet structures<sup>1</sup> to depolarization of the sarcolemma via the transverse tubule. The released  $Ca^{2+}$  causes activation of contraction when the myoplasmic free  $Ca^{2+}$  exceeds  $5 \times 10^{-7}$  M. Recent studies report purification and reconstitution of a 400-K protein from SR that binds ryanodine and is thought to represent a  $Ca^{2+}$  channel.<sup>2-4</sup> Structural similarities suggest the origin of this  $Ca^{2+}$  channel protein to be the junctional feet attaching the T-tubule to the terminal cisternae. The longitudinal elements of the SR contain very few  $Ca^{2+}$  channels but have a high composition of the 100,000-dalton  $Ca^{2+}$ -ATPase protein that pumps  $Ca^{2+}$  from outside to inside the SR membrane. The  $Ca^{2+}$  channels in the SR terminal cisternae open to release  $Ca^{2+}$  and initiate contraction, and the  $Ca^{2+}$ -ATPase pumps the  $Ca^{2+}$  into the SR membrane to promote relaxation of skeletal muscle. These two functions of the SR, i.e.,  $Ca^{2+}$  release and  $Ca^{2+}$  uptake, are important elements in the electromechanical coupling pathway of skeletal muscle. Little is known about the effects of volatile anesthetics on these two functions of the SR and what role, if any, such effects may have on skeletal muscle in clinical anesthesia. Several different nerve and muscle mechanisms on which volatile anesthetics may act are illustrated in figure 1. Utilizing *in vivo* or *in vitro* nerve-muscle preparations, it is difficult to differentiate which of these SR membrane mechanisms the anesthetic agents might be affecting. By utilizing isolated SR membrane vesicles, it becomes possible to study membrane-anesthetic interactions. However, investigations of volatile anesthetics effect on  $Ca^{2+}$  uptake and release by isolated SR membranes have been confounded by variations in methodology. The impact of these variations in methodology on SR membrane studies has been discussed.<sup>5,6</sup> Variations in the manner in which volatile anesthetics have been applied in SR studies is equally concerning. These varying methodologies may explain why, for example, halothane has been reported to depress,<sup>7-10</sup> stimulate,<sup>10-13</sup> or have no effect<sup>14</sup> on  $Ca^{2+}$  uptake by isolated SR membranes. In the present study we have isolated SR membrane vesicles in which two different  $Ca^{2+}$  regulatory functions, i.e.,  $Ca^{2+}$  uptake and  $Ca^{2+}$  release, can be studied. The effects of halothane, enflurane, and isoflurane on these  $Ca^{2+}$  regulatory functions of the SR have been measured.

\* Professor of Anesthesiology.

† Medical Student.

Received from the Department of Anesthesiology, University of Texas Health Science Center, Houston, Texas. Accepted for publication May 5, 1988. Supported in part by NIH Grant No. GM23875 and Medical Student Research Training Program Grant No. 5T35-HL-07615.

Address reprint requests to Dr. Nelson: Department of Anesthesiology, University of Texas, 6431 Fannin, 5. 020 MSMB, Houston, TX 77030.

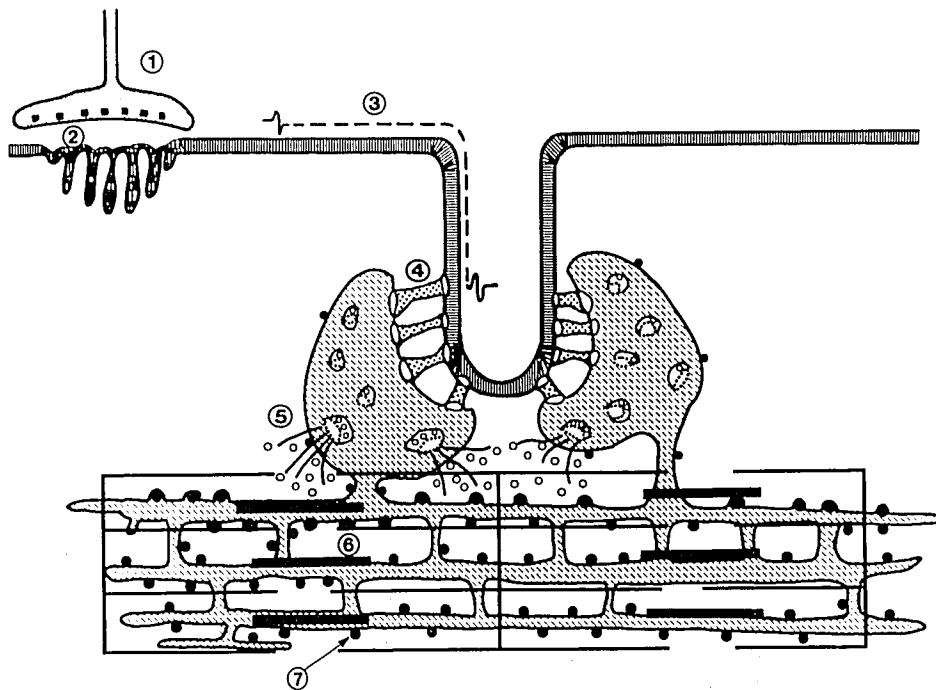

FIG. 1. Illustration of structures in skeletal muscle electromechanical coupling where anesthetics may act. (1) Nerve ending where acetylcholine is stored and released; (2) the muscle endplate containing acetylcholine receptors; (3) the propagated muscle action potential; (4) feet structures between transverse tubule; and (5) terminal cisternae of SR that contain  $\text{Ca}^{2+}$  release channels; (6) the thick and thin contractile elements where  $\text{Ca}^{2+}$  activates contraction; and (7) the  $\text{Ca}^{2+}$ -ATPase protein that pumps  $\text{Ca}^{2+}$  back inside the longitudinal elements of SR. The present study measured effects of volatile anesthetics on  $\text{Ca}^{2+}$  release channels (5) and the  $\text{Ca}^{2+}$  pump protein (7) in isolated SR membrane vesicles.

### Methods

Two separate SR membrane vesicle fractions were isolated as follows. White skeletal muscle obtained from the back and hind limbs of rabbits was sliced into small pieces after placing the excised muscle on an ice block. The sliced muscle was then suspended in 5 volumes of 20 mM histidine, pH 6.8, and homogenized for 20 s at 3-min intervals, and the 20-s homogenization was repeated six times. During homogenization pH was checked and when necessary adjusted to 6.8 by addition of 0.1 M NaOH. The homogenate was centrifuged at  $8,700 \times g$  for 15 min to spin down and remove myofibrillar material. The supernatant was filtered through filter paper (Whatman reeve angel grade 802, Whatman Inc., Clifton, NJ) and then adjusted to 0.6 M KCl to solubilize actomyosin complex. The supernatant was then centrifuged at  $17,700 \times g$  for 45 min, and the resultant pellet was suspended in 20 mM histidine (pH 6.8), 150 mM KCl, this suspension was centrifuged at  $48,000 \times g$ , and the pellet was finally suspended at 20–30 mg/ml in 20 mM histidine, 150 mM KCl, and 0.3 M trehalose. This fraction ( $8,700$ – $17,000 \times g$ ) is referred to as a heavy SR (HSR) fraction. The supernatant from the  $17,000 \times g$  spin was then centrifuged at  $48,000 \times g$  for 60 min, the pellet was suspended in 20 mM histidine, 150 mM KCl, and this suspension was centrifuged for 30 min at  $48,000 \times g$ . The pellet was finally suspended in 20 mM histidine, 150 mM KCl, 0.3 M trehalose, and referred to as the light SR (LSR) fraction. The homogenization and centrifugation procedures were

performed at  $4^\circ \text{C}$ . A Beckman (Spinco Div., Palo Alto, CA) JA-21 refrigerated centrifuge with JA-10 and JA-20 rotors was used. The SR samples were stored at  $-85^\circ \text{C}$  until used for these studies. Protein concentration was determined by the Lowry method, and  $\text{Ca}^{2+}$  uptake and release are expressed per milligram of SR protein.

The  $\text{Ca}^{2+}$  uptake and  $\text{Ca}^{2+}$  release properties of the SR were measured in a 3-ml cuvette with absorbance changes measured by a Hewlett-Packard Model 8451 diode array spectrophotometer (Hewlett-Packard, Scientific Instrument Div., Palo Alto, CA). Contents of the cuvette were continuously mixed by a magnetic stir bar and maintained at  $30^\circ \text{C}$  by a circulating water bath. Changes in  $\text{Ca}^{2+}$  concentration outside the SR membrane were quantitated by dual wavelength spectrophotometry (absorbance 650–absorbance 700 nm) using the  $\text{Ca}^{2+}$  indicator dye arsenazo III. The rate of inward  $\text{Ca}^{2+}$  transport was determined in a 1 ml volume containing MgATP, 1 mM; histidine, 20 mM (pH 6.8); KCl, 150 mM;  $\text{Na}_3\text{P}$ , 5 mM; arsenazo III, 16  $\mu\text{M}$ ; creatine-phosphate, 5 mM; creatine-phosphokinase, 5  $\mu\text{g}/\text{ml}$ ; K-oxalate, 5 mM; and SR protein, 50  $\mu\text{g}/\text{ml}$ . The inward  $\text{Ca}^{2+}$  transport was initiated by the addition of 75  $\mu\text{M}$   $\text{Ca}^{2+}$  to the cuvette contents described above. Rate of  $\text{Ca}^{2+}$  uptake was determined from the slope of the absorbance change versus time recorded plot of the reaction.

$\text{Ca}^{2+}$ -induced  $\text{Ca}^{2+}$  release from the HSR was measured in a 1-ml cuvette volume containing the same substances and concentrations as described for the  $\text{Ca}^{2+}$  uptake except that K-oxalate was omitted and the SR concentration

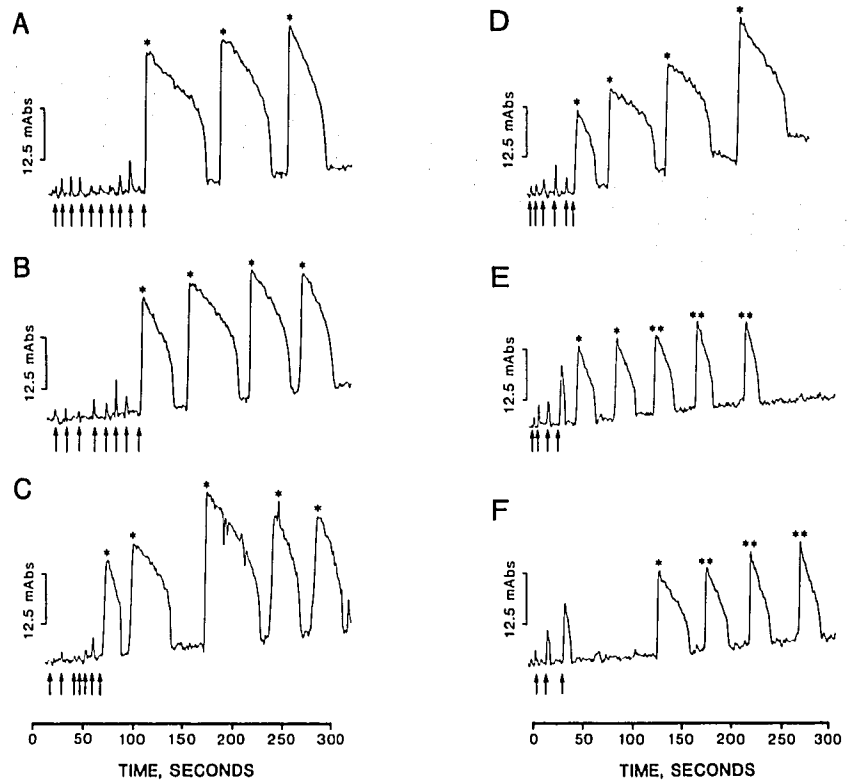

FIG. 2. Effect of varying concentrations of halothane on the threshold Ca<sup>2+</sup> load for Ca<sup>2+</sup>-induced Ca<sup>2+</sup> release. Arrows (†) indicate addition of 5 nmol Ca<sup>2+</sup>. \*Ca<sup>2+</sup>-induced Ca<sup>2+</sup> release. \*\*Spontaneous Ca<sup>2+</sup> release, i.e., no Ca<sup>2+</sup> added. Added Ca<sup>2+</sup> and any subsequent Ca<sup>2+</sup> released by SR was then actively transported into membrane, reversing the Ca<sup>2+</sup> signal. Threshold values, nmol Ca<sup>2+</sup>/mg SR protein are as follows: A. control = 50; B. .004 MAC = 40; C. .0056 MAC = 35; D. .011 MAC = 30; E. .022 MAC = 20; F. .045 MAC = 15.

was 1 mg/ml. The SR was loaded with Ca<sup>2+</sup> by sequentially adding 5 nmol Ca<sup>2+</sup> boluses. Each 5 nmol Ca<sup>2+</sup> bolus was added after the previous Ca<sup>2+</sup> bolus had been completely taken up by the SR. These 5 nmol Ca<sup>2+</sup> additions continued until finally the addition of Ca<sup>2+</sup> initiated reversible Ca<sup>2+</sup>-induced Ca<sup>2+</sup> release from the SR. The total cumulative Ca<sup>2+</sup> added to initiate Ca<sup>2+</sup>-induced Ca<sup>2+</sup> release is referred to as the Ca<sup>2+</sup> threshold. This procedure is illustrated by the data in figure 2.

Volatile anesthetics were equilibrated inside the cuvettes in the following manner. The cuvette was sealed by a teflon septum-lined screw cap that allowed the anesthetics to be injected into the sealed cuvettes. Each anesthetic was prepared in stock solutions in ethanol such that a constant volume of 0.5  $\mu$ l added to the cuvette produced the required concentration of anesthetic. After adding anesthetic agent a 2-min equilibration period was allowed before initiating experiments by addition of Ca<sup>2+</sup>. Under the conditions of measurement in the present study the cuvette had a liquid volume of 1.0 ml and a gas phase volume of 3.58 ml. A liquid/gas partition coefficient of 0.96 was determined in the system for halothane by sampling the gas and liquid phases and determining the concentration of halothane in each by gas chromatography. Values for the liquid/gas partition coefficients for enflurane and isoflurane of 0.95 and 0.74, respectively, were

extrapolated to 30° C from other published values.<sup>15</sup> The anesthetic concentrations are expressed as a percent of the MAC producing anesthesia in 50% of treated rabbits. The relationships between liquid and gas concentrations of the anesthetics in the cuvette system and their MAC values are described (table 1). The MAC values reported in this study relate to the anesthetic concentration in the gas phase of the cuvette. The effect of each anesthetic concentration, added in 50  $\mu$ l ethanol, was compared to an equal volume of ethanol without anesthetic. The ethanol control produced 0.05% ethanol in final concentration.

Three different rabbits were used to isolate three different LSR and HSR fractions. Two controls were determined immediately before duplicate determinations at each anesthetic concentration for each of the three membrane preparations. The data were statistically analyzed first by analysis of variance, which revealed a significant ( $P = 0.0013$ ) interaction between anesthetic agent and the concentration of anesthetic. This indicated that these factors are not acting independently of each other and that the main effects, i.e., anesthetic agents and concentration, cannot be considered. Instead, simple effects, i.e., anesthetic agent *versus* anesthetic agent at each concentration, were tested by the least significant difference method at the 5% level of significance.

TABLE 1. Distribution of Volatile Anesthetics in a Closed Cuvette System\* and the Relationship to MAC Values for Rabbit

| Anesthetic | Total Amount Added ( $\mu\text{M}$ ) | Coefficient of Distribution 30° C | Liquid Concentration ( $\mu\text{M}$ ) | Gas Concentration ( $\mu\text{M}$ ) | MAC Value (gas) | MAC Vol% |
|------------|--------------------------------------|-----------------------------------|----------------------------------------|-------------------------------------|-----------------|----------|
| Halothane  | 2.55                                 | 0.96                              | 540                                    | 563                                 | 1.0             | 1.4      |
| Enflurane  | 5.10                                 | 0.95                              | 1070                                   | 1126                                | 1.0             | 2.9      |
| Isoflurane | 3.65                                 | 0.74                              | 625                                    | 845                                 | 1.0             | 2.1      |

\* The closed cuvette system contained 1.0 ml of aqueous volume and 3.58 ml of gas volume. Example for halothane:

$$\text{Coefficient distribution} = 0.96 = \frac{(2.55 - X)/1 \text{ ml aqueous}}{X/3.58 \text{ ml gas}}$$

where X = moles anesthetic in gas phase at equilibrium.

## Results

### ANESTHETIC AGENT EFFECTS ON $\text{Ca}^{2+}$ UPTAKE

The rate of  $\text{Ca}^{2+}$  uptake for the controls averaged  $23.7 \pm 1.8 \text{ nmol Ca}^{2+}/\text{mg} \cdot \text{s}^{-1}$  for the light SR fractions and  $15.6 \pm 1.6 \text{ nmol Ca}^{2+}/\text{mg} \cdot \text{s}^{-1}$  for the heavy SR fractions. At anesthetic concentrations ranging from 0.06 to  $2.3 \times \text{MAC}$  (i.e., 6–230% MAC), each of the agents tested increased the  $\text{Ca}^{2+}$  uptake rate above that for the controls (fig. 3). The effects of these anesthetic agents on  $\text{Ca}^{2+}$  uptake by LSR and HSR fractions were qualitatively and quantitatively similar (fig. 3). Halothane increased the rate of  $\text{Ca}^{2+}$  uptake maximally at approximately 1.1 MAC for HSR and LSR. At a halothane concentration equivalent to  $2.3 \times \text{MAC}$ , rate of  $\text{Ca}^{2+}$  uptake was below peak halothane effect but above control levels (fig. 3). The effects

of enflurane on  $\text{Ca}^{2+}$  uptake by LSR and HSR fractions were qualitatively similar to halothane effects. At  $1.6 \times \text{MAC}$  enflurane produced rates of  $\text{Ca}^{2+}$  uptake approximately 1.8 times greater than control rates for both LSR and HSR fractions (fig. 3). Increasing enflurane concentration from 1.6 to  $2.1 \times \text{MAC}$  reduced the extent of  $\text{Ca}^{2+}$  uptake rate activation of both LSR and HSR fractions (fig. 3). For each increase in isoflurane concentration from 0.06 to  $1.9 \times \text{MAC}$ , there was an increase in the rate of  $\text{Ca}^{2+}$  uptake by LSR and HSR fractions (fig. 3). Unlike halothane and enflurane, there was no decrease in activation of  $\text{Ca}^{2+}$  uptake rate at the higher concentrations of isoflurane tested. Over clinically relevant concentrations of these anesthetic agents, the effect of each is to increase the rate of  $\text{Ca}^{2+}$  uptake above the rates observed in the absence of anesthetic. Statistically significant differences ( $P < 0.05$ ) were observed for the  $\text{Ca}^{2+}$  uptake activation in HSR fractions as follows: at 1.4–1.7 MAC enflurane effect > halothane effect and > isoflurane effect; at 1.9–2.2 MAC enflurane and isoflurane effects > halothane effect.

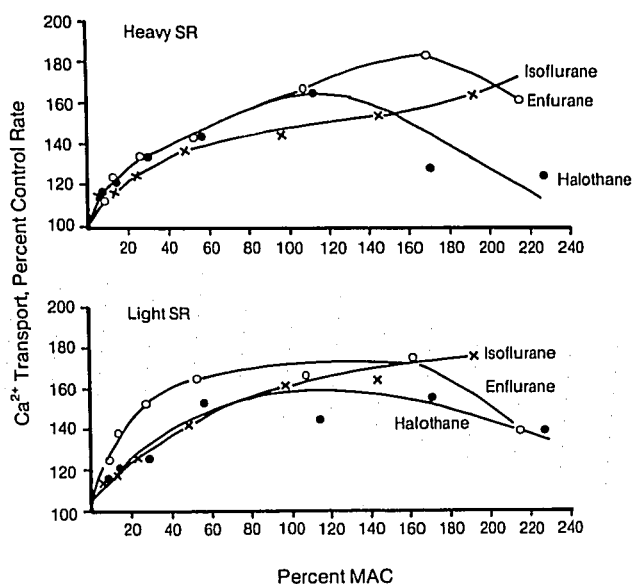

FIG. 3. Effect of volatile anesthetics on rate of  $\text{Ca}^{2+}$  uptake in heavy and light fractions of isolated skeletal muscle SR vesicles.  $\text{Ca}^{2+}$  uptake was measured spectrophotometrically after the SR was equilibrated in a closed cuvette at one of the anesthetic concentrations shown. MAC is percent of  $\text{ED}_{50}$  anesthetic dose.

### EFFECTS ON $\text{Ca}^{2+}$ -INDUCED $\text{Ca}^{2+}$ RELEASE

The phenomenon of  $\text{Ca}^{2+}$ -induced  $\text{Ca}^{2+}$  release from skeletal SR membranes is demonstrated by the experimental results presented (fig. 2). In the presence of MgATP when  $\text{Ca}^{2+}$  is added to the outside of the SR membrane, the  $\text{Ca}^{2+}$  pump protein transports  $\text{Ca}^{2+}$  to the inside. In our experiments relatively small, 5 nmol amounts of  $\text{Ca}^{2+}$  are added each time, and this is initially rapidly removed by the SR. As more and more 5 nmol  $\text{Ca}^{2+}$  additions are made and removed by the SR, a critical  $\text{Ca}^{2+}$  load is achieved inside the SR. When this critical  $\text{Ca}^{2+}$  load is obtained, then the next addition of  $\text{Ca}^{2+}$  causes a release of  $\text{Ca}^{2+}$  from the SR. This critical  $\text{Ca}^{2+}$  load is referred to as the threshold for  $\text{Ca}^{2+}$ -induced  $\text{Ca}^{2+}$  release. The  $\text{Ca}^{2+}$ -induced  $\text{Ca}^{2+}$  release is a reversible process, and the SR can reuptake the released  $\text{Ca}^{2+}$  (fig. 2). It is proposed that this  $\text{Ca}^{2+}$  release process is due to  $\text{Ca}^{2+}$  channels in the SR membrane that open and release  $\text{Ca}^{2+}$  under specific conditions. Also, it is necessary for

FIG. 4. Effect of volatile anesthetics on threshold for Ca<sup>2+</sup> release from isolated skeletal muscle SR membrane vesicles. The threshold Ca<sup>2+</sup> load necessary for Ca<sup>2+</sup>-induced Ca<sup>2+</sup> release to occur is reduced by each of the anesthetic agents tested.

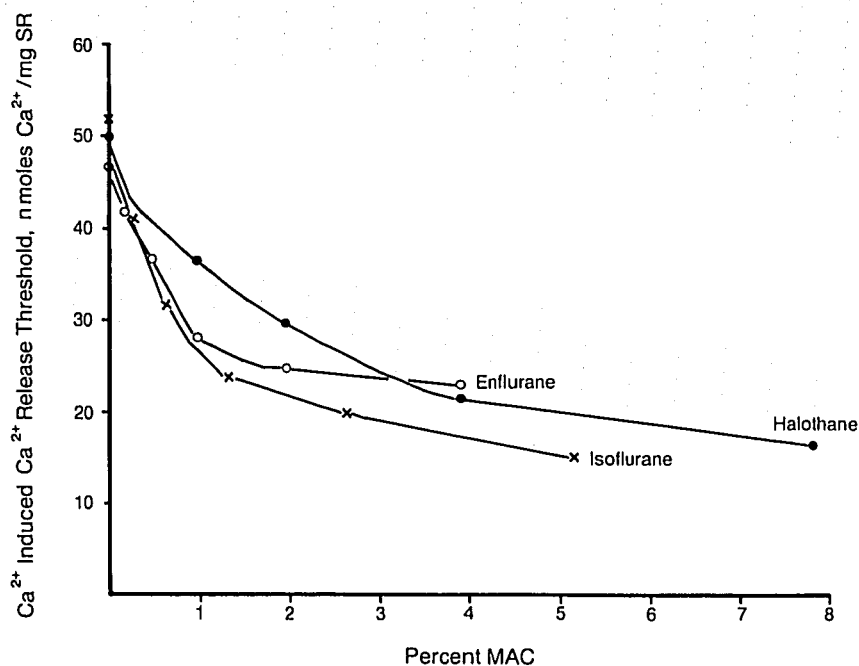

these channels to close in order for the SR Ca<sup>2+</sup> pump to be able to completely reuptake the released Ca<sup>2+</sup>.

Each volatile anesthetic tested had a similar effect on the Ca<sup>2+</sup>-induced Ca<sup>2+</sup> release process, *viz.*, each tended to lower the threshold Ca<sup>2+</sup> at which Ca<sup>2+</sup> release occurred (fig. 4). It is notable that the concentration range for anesthetic agent effects on the Ca<sup>2+</sup> release function, *i.e.*, 0.0025–0.08 MAC, is 1–2 orders of magnitude below the anesthetic agent concentration range affecting Ca<sup>2+</sup> uptake, *i.e.*, 0.10–2.3 MAC. Halothane had a half-maximal effect on Ca<sup>2+</sup> release at a concentration equivalent to 0.015 MAC, whereas enflurane and isoflurane had half-maximal effects at 0.005 and 0.006 MAC, respectively. Higher concentrations of anesthetic agents could not be tested because they prevented achieving the minimal Ca<sup>2+</sup> load in the SR, a necessity for Ca<sup>2+</sup>-induced Ca<sup>2+</sup> release to occur. As supported by the experiments described below, this failure of SR to load Ca<sup>2+</sup> in the presence of high concentrations of anesthetics is not a consequence of an inhibition of Ca<sup>2+</sup> uptake but more likely is related to the opening of Ca<sup>2+</sup> channels.

The effect of these volatile anesthetics to cause Ca<sup>2+</sup> release to occur at lower Ca<sup>2+</sup> thresholds appears to be related to Ca<sup>2+</sup> channel events. Ruthenium red, an agent that blocks Ca<sup>2+</sup> channels but does not affect the Ca<sup>2+</sup> uptake system,<sup>16</sup> blocks the effect of these anesthetic agents on Ca<sup>2+</sup> release. This blocking effect of ruthenium red is illustrated for halothane (fig. 5) but was also observed for enflurane and isoflurane (data not shown). Similar conclusions were made in a previous study for halothane effects on isolated SR membranes.<sup>6</sup> We have

previously demonstrated that this same Ca<sup>2+</sup> release channel is ryanodine-sensitive.<sup>17</sup>

### Discussion

The SR performs major functions in regulating the free Ca<sup>2+</sup> concentration in the myoplasm and by so doing it controls contractility. A 100,000-dalton Ca<sup>2+</sup>-ATPase pump protein utilizes MgATP to translocate Ca<sup>2+</sup> from myoplasm to the inside of the SR membrane. This process is essential for normal skeletal muscle relaxation to occur. Release of Ca<sup>2+</sup> from the SR storage sites occurs through Ca<sup>2+</sup> channels that open in response to the muscle action potential. These Ca<sup>2+</sup> channel mechanisms probably represent the primary source of Ca<sup>2+</sup> for initiating contraction. Obviously, any effect of potent inhalation anesthetics such as halothane, enflurane, or isoflurane on these SR membrane functions could alter contractility. Isolated SR membranes have been studied in many different ways, and there is considerable knowledge about structure-function relationships. Most studies have attempted to determine the effect of anesthetics on the Ca<sup>2+</sup> uptake function of SR because this was the earliest and best understood property of the membrane. In the absence of oxalate or other Ca<sup>2+</sup> precipitating anions, Ca<sup>2+</sup> uptake occurs until the intravesicular concentration reaches a level that inhibits the Ca<sup>2+</sup> pump. Under these conditions of study only nmol amounts of Ca<sup>2+</sup> are taken up by 1 mg of SR protein and halothane, 18–118 mM (25–250 × MAC), with decreased rate and amount of Ca<sup>2+</sup> binding.<sup>10</sup> These same concentrations of halothane also de-

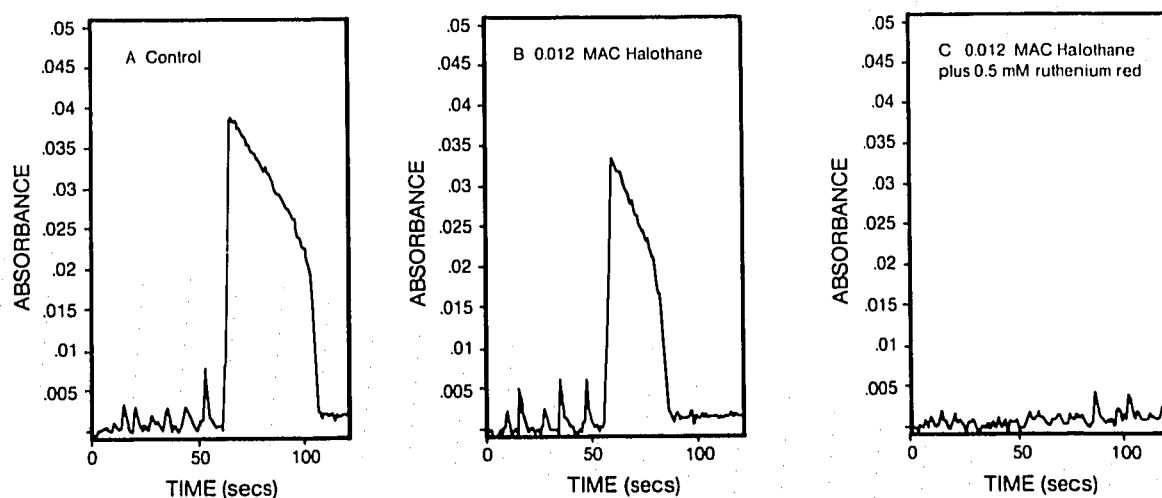

FIG. 5. The effect of ruthenium red on halothane effect to lower  $\text{Ca}^{2+}$  threshold for  $\text{Ca}^{2+}$ -induced  $\text{Ca}^{2+}$  release from a rabbit heavy SR fraction. A. Control and a total of  $8 \times 5 \text{ nmol } \text{Ca}^{2+} = 40 \text{ nmol } \text{Ca}^{2+}/\text{mg SR}$  for threshold. B. In presence of 0.015 MAC halothane threshold is reduced to  $30 \text{ nmol } \text{Ca}^{2+}/\text{mg SR}$ . C. 0.5 mM ruthenium red blocks the effect of 0.015 MAC halothane and no  $\text{Ca}^{2+}$  release occurred after adding 85 nmol  $\text{Ca}^{2+}/\text{mg SR}$ .

creased rate and amount of  $\text{Ca}^{2+}$  uptake in the presence of oxalate.<sup>10</sup> Oxalate forms insoluble  $\text{Ca}^{2+}$ -oxalate and prevents the intravesicular  $\text{Ca}^{2+}$  from reaching a concentration that inhibits the pump. Under these experimental conditions  $\mu\text{mol } \text{Ca}^{2+}/\text{mg SR}$  membrane are accumulated. Other studies that measured halothane effects in the presence of oxalate reported stimulation of  $\text{Ca}^{2+}$  uptake rate and total amount<sup>10-13</sup> or inhibition.<sup>7-10</sup> Although methodology varies considerably among these studies, there is a trend for halothane to stimulate  $\text{Ca}^{2+}$  uptake at concentrations of  $3-4 \times \text{MAC}$  or below, whereas halothane concentrations greater than  $10 \times \text{MAC}$  tend to inhibit  $\text{Ca}^{2+}$  uptake. It may be that halothane concentrations below  $3-4 \times \text{MAC}$  are acting directly on the 100,000-dalton  $\text{Ca}^{2+}$ -ATPase transport protein and/or its immediate membrane domain, whereas halothane concentrations above  $10 \times \text{MAC}$  have general perturbation effects on the lipid moiety of the SR membrane.

Relative to these previous studies on the effect of halothane on  $\text{Ca}^{2+}$  uptake function in the SR, our studies provide new insights. Our studies are limited to varying anesthetic concentrations and this has shown in the case of halothane that its stimulatory effects on  $\text{Ca}^{2+}$  uptake are limited to an upper concentration of  $3 \times \text{MAC}$  and with greater concentrations activation decreases. If we had tested higher concentrations of halothane, we may have observed inhibition of  $\text{Ca}^{2+}$  uptake as reported by others.<sup>8,10</sup> The range of anesthetic-related enflurane concentrations that stimulated  $\text{Ca}^{2+}$  uptake was double that for halothane and that for isoflurane was greater than enflurane. If these  $\text{Ca}^{2+}$  uptake-inactivating effects of the anesthetics at higher concentrations are a consequence of generalized membrane effects, then it would appear that

the efficacy rating would be halothane > enflurane > isoflurane. Because these inactivating effects occur at anesthetic concentrations outside the clinical range, they may have no relation to the anesthetic properties of these drugs.

In addition to studying the effects of these inhalation anesthetics on the  $\text{Ca}^{2+}$ -ATPase pump protein, we investigated the effects on a separate function, the  $\text{Ca}^{2+}$  release channel of the SR. By investigating two different functions that are anatomically separated in the SR membrane, it may be possible to determine if a generalized membrane effect is produced by the anesthetics or if the anesthetic is acting directly on the protein.

We observed that the volatile anesthetic agent effects on the  $\text{Ca}^{2+}$ -ATPase pump protein of the SR membrane occurred at concentrations 10 times greater than those concentrations affecting the  $\text{Ca}^{2+}$  channel. In relation to anesthetic potency, the  $\text{ED}_{50}$  effects on  $\text{Ca}^{2+}$  uptake occurred within the useful clinical concentration range for each of the agents tested. If this *in vitro* effect of inhalational anesthetics to increase  $\text{Ca}^{2+}$  uptake into the storage membranes is also occurring during *in vivo* clinical anesthesia, then the result would be to augment skeletal muscle relaxation. This is consistent with the function of this SR  $\text{Ca}^{2+}$  pump to remove  $\text{Ca}^{2+}$  from the myoplasm and produce muscle relaxation.

Although the clinical effects of these anesthetic agents on the  $\text{Ca}^{2+}$ -ATPase pump might be to enhance muscle relaxation, it appears that the opposite is true for the anesthetic effects on the  $\text{Ca}^{2+}$  channel. The  $\text{Ca}^{2+}$  channel evaluated in this study is a receptor-operated  $\text{Ca}^{2+}$  channel and  $\text{Ca}^{2+}$  is the agonist that causes the channel to open and release  $\text{Ca}^{2+}$ . Under our experimental conditions the

channel can be opened by Ca<sup>2+</sup> only after a critical Ca<sup>2+</sup> load has been taken up by the SR membrane vesicle. The effect of the anesthetics used in this study was to lower the threshold amount of Ca<sup>2+</sup> load necessary for Ca<sup>2+</sup> to open the channel. Thus, the critical balance for Ca<sup>2+</sup> channel opening events between Ca<sup>2+</sup> concentration inside the membrane and the Ca<sup>2+</sup> agonist concentration outside the membrane is altered by the presence of the volatile anesthetics. The sensitivity of this Ca<sup>2+</sup> channel to these agents is 10 times greater than that for the Ca<sup>2+</sup> uptake system. In relation to skeletal muscle relaxation, the net effect of these agents on the Ca<sup>2+</sup>-induced Ca<sup>2+</sup> release channel is to release Ca<sup>2+</sup> from the SR storage site, increase myoplasmic Ca<sup>2+</sup>, and produce contracture. Whether these effects have any relation to those occurring during clinical anesthesia is unknown. There is considerable disagreement as to whether the Ca<sup>2+</sup>-induced Ca<sup>2+</sup> release channel plays any role in normal excitation-contraction coupling.<sup>18</sup> There is a good evidence that this mechanism for Ca<sup>2+</sup> release is pathogenic for anesthetic-induced malignant hyperthermia.<sup>19-22</sup>

Additional studies are necessary to determine what significance, if any, these observations on an isolated membrane system have to the clinical effects of halothane, enflurane, and isoflurane. The findings from this study are of considerable interest because they demonstrate similarities and dissimilarities in the dose effect of these agents on two different functional mechanisms in the same membrane. It is of particular interest to note the concentration of anesthetics affecting the Ca<sup>2+</sup> channel properties of the SR because these are far below clinical MAC values and below most reported values that have biologic effect.

Finally, we have demonstrated a closed cuvette with liquid/gas phases and the methods by which we relate anesthetic effect to its gas phase concentration and to clinical MAC values. Several past studies with volatile anesthetics are flawed because the concentration of anesthetic was not maintained at a constant concentration.

The laboratory technical support provided by Pat Turk and D. LaLonde and typing of the manuscript by Margie Choate are gratefully acknowledged.

### References

1. Franzini-Armstrong C: Structure in sarcoplasmic reticulum. *Fed Proc* 39:2403-2409, 1980
2. Lai AF, Erickson HP, Rousseau E, Liu Q-Y, Meissner G: Purification and reconstitution of the calcium release channel from skeletal muscle. *Nature* 331:315-319, 1988
3. Inui M, Saito A, Fleischer S: Purification of the ryanodine receptor and identity with feet structures of junctional terminal cisternae of sarcoplasmic reticulum from fast skeletal muscle. *J Biol Chem* 262:1740-1747, 1987

4. Pessah IN, Francini AO, Seales DJ, Waterhouse AL, Casida J: Calcium-ryanodine receptor complex. *J Biol Chem* 261:8643-8648, 1986
5. Nelson TE: Skeletal sarcoplasmic reticulum in the malignant hyperthermia syndrome. *Recent Advances in Malignant Hyperthermia*. Edited by Britt BA. Hingham, Kluwer Academic Publications, San Diego, 1987, pp 43-78
6. Beeler T, Gable K: Effect of halothane on Ca<sup>2+</sup>-induced Ca<sup>2+</sup> release from sarcoplasmic reticulum vesicles isolated from rat skeletal muscle. *Biochim Biophys Acta* 921:142-152, 1985
7. Diamond EM, Berman MC: The effect of halothane on the stability of Ca<sup>2+</sup> activity of isolated fragmented sarcoplasmic reticulum. *Biochem Pharmacol* 29:375-381, 1980
8. Blank TJJ, Gruner R, Suffecovl SL, Thompson M: Calcium uptake by isolated sarcoplasmic reticulum: Examination of halothane inhibition, pH dependence, and Ca<sup>2+</sup> dependence of normal and malignant hyperthermia human muscle. *Anesth Analg* 60:492-498, 1981
9. Dhalla NS, Sulakhe PV, Clinch NF, Wode JG, Naimark A: Influence of fluothane on calcium accumulation by the heavy microsomal fraction of human skeletal muscle: Comparison with a patient with malignant hyperpyrexia. *Biochem Med Metab Biol* 6:333-343, 1972
10. Gronert GA, Heffron JJA, Taylor SR: Skeletal muscle sarcoplasmic reticulum in porcine malignant hyperthermia. *Eur J Pharmacol* 58:179-187, 1979
11. Isaacs H, Heffron JJA: Morphological and biochemical defects in muscles of human carriers of the malignant hyperthermia syndrome. *Br J Anaesth* 47:475-480, 1975
12. Britt BA, Kalow W, Gordon A, Humphrey JG, Rewcastle NB: Malignant hyperthermia: An investigation of five patients. *Can Anaesth Soc J* 20:431-467, 1973
13. Nelson TE, Jones EW, Venable JH, Kerr DD: Malignant hyperthermia of Poland China swine: Studies of a myogenic etiology. *ANESTHESIOLOGY* 36:52-56, 1972
14. Kalow W, Britt BA, Terreau ME, Haist C: Metabolic error of muscle metabolism after recovery from malignant hyperthermia. *Lancet* 2:895-898, 1970
15. Roth SJ, Miller KW: *Molecular and Cellular Mechanisms of Anesthetics*. New York, Plenum, 1986, pp 459-470
16. Chu A, Volpe P, Costello B, Fleischer S: Functional characterization of junctional terminal cisternae from mammalian fast skeletal muscle sarcoplasmic reticulum. *Biochemistry* 25:8315-8324, 1986
17. Nelson TE: Ryanodine: Antithetical calcium channel effects in skeletal muscle sarcoplasmic reticulum. *J Pharmacol Exp Ther* 242:56-61, 1987
18. Endo M: Calcium release from the sarcoplasmic reticulum. *Physiol Rev* 57:71-108, 1977
19. Nelson TE: Abnormality in calcium release from skeletal sarcoplasmic reticulum of pigs susceptible to malignant hyperthermia. *J Clin Invest* 72:862-870, 1983
20. Ohnishi ST, Taylor S, Gronert G: Calcium-induced Ca<sup>2+</sup> release from sarcoplasmic reticulum of pigs susceptible to malignant hyperthermia. *FEBS Lett* 161:103-107, 1983
21. O'Brien PJ: Porcine malignant hyperthermia susceptibility: Hypersensitive calcium release mechanism of skeletal muscle sarcoplasmic reticulum. *Can J Vet Res* 50:318-328, 1986
22. Kim DH, Sreter FA, Ohnishi ST, Ryan JF, Roberts JT, Allen PD, Meszaros LG, Antoniu B, Ikemoto N: Kinetic studies of Ca<sup>2+</sup> release from sarcoplasmic reticulum of normal and malignant hyperthermia susceptible pig muscles. *Biochim Biophys Acta* 775:320-327, 1984
